# Supplementary material
Source: ML conference proceedings conference paper supplement (https://proceedings.mlr.press/v97/greenfeld19a.html)
Supplement: Supplementary file [file greenfeld19a-supp.pdf]

# Learning to Optimize Multigrid PDE Solvers -Supplementary Material-

Daniel Greenfeld<sup>1</sup> Meirav Galun<sup>1</sup> Ron Kimmel<sup>2</sup> Irad Yavneh<sup>2</sup> Ronen Basri<sup>1</sup>

Below we prove Theorem 1. The proof is based on two supporting lemmas. We begin with some mathematical terms.

Consider the  $n \times n$  block-circulant matrix of the following form, where  $n = kb$  and all numbering of rows, columns, blocks, etc., starts from 0 for convenience

$$A = \begin{pmatrix} A^{(0)} \\ A^{(1)} \\ A^{(2)} \\ \vdots \\ A^{(b-1)} \end{pmatrix},$$

where the blocks  $A^{(m)}$ ,  $m = 0, \dots, b-1$  are  $k \times n$  real or complex matrices whose elements satisfy

$$A_{l,j}^{(m)} = A_{l, \text{mod}(j-k,n)}^{(m-1)}, \quad m = 1, \dots, b-1 \quad (1)$$

and hence  $A_{l,j} = A_{\text{mod}(l-k,n), \text{mod}(j-k,n)}$ . Here, we are adopting the MATLAB form  $\text{mod}(x, y) = "x \text{ modulo } y"$ , i.e., the remainder obtained when dividing integer  $x$  by integer  $y$ . Below, we continue to use  $l$  and  $j$  to denote row and column numbers, respectively, and apply the decomposition:

$$l = l_0 + tk, \quad j = j_0 + sk, \quad (2)$$

where  $l_0 = \text{mod}(l, k)$ ,  $t = \lfloor \frac{l}{k} \rfloor$ ,  $j_0 = \text{mod}(j, k)$ ,  $s = \lfloor \frac{j}{k} \rfloor$ . Note that  $l, j \in \{0, \dots, n-1\}$ ;  $l_0, j_0 \in \{0, \dots, k-1\}$ ;  $t, s \in \{0, \dots, b-1\}$ .

Let the column vector

$$v_m = \left[ 1, e^{i\frac{2\pi m}{n}}, \dots, e^{i\frac{2\pi m j}{n}}, \dots, e^{i\frac{2\pi m(n-1)}{n}} \right]^*$$

denote the unnormalized  $m$ th Fourier component of dimension  $n$ , for  $m = 0, \dots, n-1$ . Let  $W$  denote the  $n \times n$  matrix whose nonzero values are comprised of the elements of the first  $b$  Fourier components as follows:

$$W_{l,j} = \delta_{l_0, j_0} v_s(l), \quad (3)$$

<sup>1</sup>Weizmann Institute of Science, Rehovot, Israel <sup>2</sup>Technion, Israel Institute of Technology, Haifa, Israel. Correspondence to: Daniel Greenfeld <daniel.greenfeld@weizmann.ac.il>.

where  $v_s(l)$  denotes the  $l$ th element of  $v_s$ , and  $\delta$  is the Kronecker delta. An example for  $W$ , with  $k = 3$  and  $b = 4$ , is given in Fig. 1.

**Lemma 1.**  $\frac{1}{\sqrt{b}}W$  is a unitary matrix.

*Proof.* Let  $W_j$  and  $W_m$  denote the  $j$ th and  $m$ th columns of  $W$ . Consider the inner product  $W_j^* W_m = \sum_{q=0}^{n-1} W_j^*(q) W_m(q)$ . For  $\text{mod}(j-m, k) \neq 0$ , the product evidently vanishes because in each term of the sum at least one of the factors is zero. For  $j = m$ , the terms where  $\text{mod}(q, k) = j_0$  are equal to 1, while the rest are equal to zero, and therefore the product is  $b$ . Finally, for  $j \neq m$  but  $\text{mod}(j-m, k) = 0$ , we can write  $m = j + rk$  for some integer  $r$  s.t.  $0 < |r| < b$ . Summing up the non-zero terms, we obtain:

$$\begin{aligned} \sum_{p=0}^{n-1} W_j^*(p) W_m(p) &= \sum_{q=0}^{b-1} v_s^*(j_0 + qk) v_{s+r}(j_0 + qk) \\ &= \sum_{q=0}^{b-1} e^{-i\frac{2\pi r(j_0+qk)}{n}} = e^{-i\frac{2\pi r j_0}{n}} \sum_{q=0}^{b-1} \left( e^{-i\frac{2\pi r}{b}} \right)^q \\ &= e^{-i\frac{2\pi r j_0}{n}} \frac{1 - e^{-i\frac{2\pi r b}{b}}}{1 - e^{-i\frac{2\pi r}{b}}} = 0. \end{aligned}$$

We conclude that  $\frac{1}{\sqrt{b}}W^* \frac{1}{\sqrt{b}}W = I_n$ , the  $n \times n$  identity matrix.  $\square$

**Lemma 2.** The similarity transformation,  $\hat{A} = \frac{1}{\sqrt{b}}W^* A \frac{1}{\sqrt{b}}W$ , yields a block-diagonal matrix  $\hat{A}$  with  $b$  blocks of size  $k \times k$ .

*Proof.* Denote the  $l$ th row of  $A$  by  $A^l$ . Then, the product  $A^l W_j$  reads

$$\begin{aligned} A^l W_j &= \sum_{p=0}^{n-1} A^l(p) W_j(p) = \sum_{q=0}^{b-1} A^l(j_0 + qk) v_s(j_0 + qk) \\ &= \sum_{q=0}^{b-1} A^{l_0+tk}(j_0 + qk) e^{-is\frac{2\pi(j_0+qk)}{n}}. \end{aligned}$$

$$W = \begin{bmatrix} 1 & 0 & 0 & 1 & 0 & 0 & 1 & 0 & 0 & 1 & 0 & 0 \\ 0 & 1 & 0 & 0 & e^{-i\frac{2\pi}{12}} & 0 & 0 & e^{-i\frac{4\pi}{12}} & 0 & 0 & e^{-i\frac{6\pi}{12}} & 0 \\ 0 & 0 & 1 & 0 & 0 & e^{-i\frac{4\pi}{12}} & 0 & 0 & e^{-i\frac{8\pi}{12}} & 0 & 0 & e^{-i\frac{12\pi}{12}} \\ 1 & 0 & 0 & e^{-i\frac{6\pi}{12}} & 0 & 0 & e^{-i\frac{12\pi}{12}} & 0 & 0 & e^{-i\frac{18\pi}{12}} & 0 & 0 \\ 0 & 1 & 0 & 0 & e^{-i\frac{8\pi}{12}} & 0 & 0 & e^{-i\frac{16\pi}{12}} & 0 & 0 & e^{-i\frac{24\pi}{12}} & 0 \\ 0 & 0 & 1 & 0 & 0 & e^{-i\frac{10\pi}{12}} & 0 & 0 & e^{-i\frac{20\pi}{12}} & 0 & 0 & e^{-i\frac{30\pi}{12}} \\ 1 & 0 & 0 & e^{-i\frac{12\pi}{12}} & 0 & 0 & e^{-i\frac{24\pi}{12}} & 0 & 0 & e^{-i\frac{36\pi}{12}} & 0 & 0 \\ 0 & 1 & 0 & 0 & e^{-i\frac{14\pi}{12}} & 0 & 0 & e^{-i\frac{28\pi}{12}} & 0 & 0 & e^{-i\frac{42\pi}{12}} & 0 \\ 0 & 0 & 1 & 0 & 0 & e^{-i\frac{16\pi}{12}} & 0 & 0 & e^{-i\frac{32\pi}{12}} & 0 & 0 & e^{-i\frac{48\pi}{12}} \\ 1 & 0 & 0 & e^{-i\frac{18\pi}{12}} & 0 & 0 & e^{-i\frac{36\pi}{12}} & 0 & 0 & e^{-i\frac{54\pi}{12}} & 0 & 0 \\ 0 & 1 & 0 & 0 & e^{-i\frac{20\pi}{12}} & 0 & 0 & e^{-i\frac{40\pi}{12}} & 0 & 0 & e^{-i\frac{60\pi}{12}} & 0 \\ 0 & 0 & 1 & 0 & 0 & e^{-i\frac{22\pi}{12}} & 0 & 0 & e^{-i\frac{44\pi}{12}} & 0 & 0 & e^{-i\frac{66\pi}{12}} \end{bmatrix}$$

 Figure 1. An example for  $W$  with  $k = 3$  and  $b = 4$ .

By repeated use of (1), this yields

$l_0 \in \{0, \dots, k-1\}$  and  $t \in \{0, \dots, b-1\}$ , yields

$$\begin{aligned} A^l W_j &= \sum_{q=0}^{b-1} A^{l_0} (j_0 + \text{mod}(q-t, b)k) e^{-is \frac{2\pi(j_0+qk)}{n}} \\ &= e^{-is \frac{2\pi tk}{n}} \sum_{q=0}^{b-1} A^{l_0} (j_0 + \text{mod}(q-t, b)k) e^{-is \frac{2\pi(j_0+(q-t)k)}{n}} \\ &= e^{-is \frac{2\pi t}{b}} \sum_{q=0}^{b-1} A^{l_0} (j_0 + \text{mod}(q-t, b)k) e^{-is \frac{2\pi(j_0+\text{mod}(q-t, b)k)}{n}} \\ &= e^{-is \frac{2\pi t}{b}} A^{l_0} W_j. \end{aligned} \quad \begin{aligned} W_l^* A W_j &= \sum_{q=0}^{b-1} W_l^* (l_0 + qk) e^{-qi \frac{2\pi s}{b}} u_j(l_0) \\ &= \sum_{q=0}^{b-1} v_t^* (l_0 + qk) e^{-qi \frac{2\pi s}{b}} u_j(l_0) \\ &= \sum_{q=0}^{b-1} e^{i \frac{2\pi t(l_0+qk)}{n}} e^{-qi \frac{2\pi s}{b}} u_j(l_0) \\ &= e^{i \frac{2\pi t l_0}{n}} u_j(l_0) \sum_{q=0}^{b-1} e^{qi \frac{2\pi(t-s)}{b}}. \end{aligned}$$

Denoting  $u_j = A^{(0)} W_j$ , we thus obtain

For  $t \neq s$ , the final sum yields

$$A W_j = \begin{pmatrix} u_j \\ e^{-i \frac{2\pi s}{b}} u_j \\ e^{-2i \frac{2\pi s}{b}} u_j \\ \vdots \\ e^{-(b-1)i \frac{2\pi s}{b}} u_j \end{pmatrix},$$

$$\sum_{q=0}^{b-1} e^{qi \frac{2\pi(t-s)}{b}} = \sum_{q=0}^{b-1} \left( e^{qi \frac{2\pi(t-s)}{b}} \right)^q = \frac{1 - e^{i2\pi(t-s)}}{1 - e^{i \frac{2\pi(t-s)}{b}}} = 0.$$

We conclude that  $W_l^* A W_j$  vanishes unless  $t = s$ , which implies the block-periodic form stated in the proposition.  $\square$

where the  $q$ th element of  $u_j$ ,  $q = 0, \dots, k-1$ , is given by

$$u_j(q) = A^q W_j = \sum_{q=0}^{b-1} A^q (j_0 + qk) v_s(j_0 + qk).$$

Multiplying on the left by  $W_l^*$  for any  $l = l_0 + tk$  with

For  $t = s$ , all the terms in the final sum in the proof are equal to 1, and therefore the sum is equal to  $b$ . This yields the following.

**Theorem 1.** Let  $W$  be the matrix defined in (3). Then,  $\hat{A} = \frac{1}{\sqrt{b}} W^* A \frac{1}{\sqrt{b}} W = \text{blockdiag}(B^{(0)}, \dots, B^{(b-1)})$ , where the elements of the  $k \times k$  blocks  $B^{(s)}$ ,  $s = 0, \dots, b-1$ , are

given by

$$\begin{aligned}
 B_{l_0, j_0}^{(s)} &= e^{i \frac{2\pi s l_0}{n}} u_j(l_0) \\
 &= e^{i \frac{2\pi s l_0}{n}} \sum_{q=0}^{b-1} A^{l_0}(j_0 + qk) v_s(j_0 + qk) \\
 &= e^{i \frac{2\pi s l_0}{n}} \sum_{q=0}^{b-1} A^{l_0}(j_0 + qk) e^{-i \frac{2\pi s(j_0 + qk)}{n}} \\
 &= e^{i \frac{2\pi s(l_0 - j_0)}{n}} \sum_{q=0}^{b-1} A^{l_0}(j_0 + qk) e^{-i \frac{2\pi s q}{b}}.
 \end{aligned}$$

**Remark 1.** *In the context of multigrid analysis, particularly in the present paper, the block size is chosen to be at least as large as the stencil. In such cases, the coefficients  $A^{l_0}(j_0 + qk)$  are equal to zero for all non-zero  $q$ , yielding the simple form:*

$$B_{l_0, j_0}^{(s)} = e^{i \frac{2\pi s(l_0 - j_0)}{n}} A^{l_0}(j_0) = e^{i \frac{2\pi s(l_0 - j_0)}{n}} A_{l_0, j_0}.$$

**Remark 2.** *The block Fourier analysis is applicable to discretized partial differential equations of any dimension  $d$  by recursion. That is, for  $d > 1$  the blocks of  $A$  are themselves block-circulant, and so on. Remark 1 also generalizes to any dimension. That is, if the diameter of the discretization stencil is at most  $k$  then each element of  $B$  is easily computed from a single element of  $A$ .*
